# Supplementary material for: Dinuclear cyclometalated platinum(ii) complexes containing a deep blue fluorescence chromophore: synthesis, photophysics and application in single dopant white PLEDs
Source: Royal Society of Chemistry journal article supplement (doi:10.1039/c6dt02472f), 2016-01-01

## Supporting Information

### **Dinuclear Cyclometalated Platinum(II) Complexes Containing Deep Blue Fluorescence Chromophore: Synthesis, Photophysics and Application in Single Dopant White PLEDs**

Youming Zhang <sup>a</sup>, Haigang Jiang <sup>a</sup>, Yu Liu <sup>a\*</sup>, Kaifeng Zhou <sup>b</sup>, Yafei Wang <sup>a</sup>,

Hua Tan<sup>a</sup>, Shijian Su <sup>b\*</sup> and Weiguo Zhu <sup>a\*</sup>

*<sup>a</sup> College of Chemistry, Key Lab of Environment-Friendly Chemistry and Application  
in Ministry of Education, Xiangtan University, Xiangtan 411105, China*

*<sup>b</sup> State Key Laboratory of Luminescent Materials and Devices (South China University  
of Technology) and Institute of Polymer Optoelectronic Materials and Devices, South  
China University of Technology, Guangzhou, P. R. China*

Email addresses:

(Y. L) liuyu03b@126.com,

(S. S) mssjsu@scut.edu.cn,

(W. Z) zhuwg18@126.com

## Contents

**Figure S1.** PL spectra of DPy(TPA)-C<sub>6</sub>DBCzC<sub>6</sub>-DFPt(pic) in different concentrations at room temperature (from 5×10<sup>-7</sup> M to 3.2×10<sup>-5</sup> M).

**Figure S2.** Cyclic voltammograms of C<sub>6</sub>DBCzC<sub>6</sub>-DFPt(pic) and DPy(TPA)-C<sub>6</sub>DBCzC<sub>6</sub>-DFPt(pic) films on platinum electrode in acetonitrile solution containing 0.1 mol/L Bu<sub>4</sub>NPF<sub>6</sub> at a scan rate of 100 mV/s by using ferrocene as an internal standard.

**Figure S3.** <sup>1</sup>H NMR spectra of compound **2** and C<sub>6</sub>DBCzC<sub>6</sub>-DFPt(pic) in CDCl<sub>3</sub>, respectively.

**Figure S4.** <sup>1</sup>H NMR spectra of compound **7** and DPy(TPA)-C<sub>6</sub>DBCzC<sub>6</sub>-DFPt(pic) in CDCl<sub>3</sub>, respectively.

**Figure S5.** MALDI-TOF mass spectra of C<sub>6</sub>DBCzC<sub>6</sub>-DFPt(pic) and DPy(TPA)-C<sub>6</sub>DBCzC<sub>6</sub>-DFPt(pic), respectively.

Figure S1.

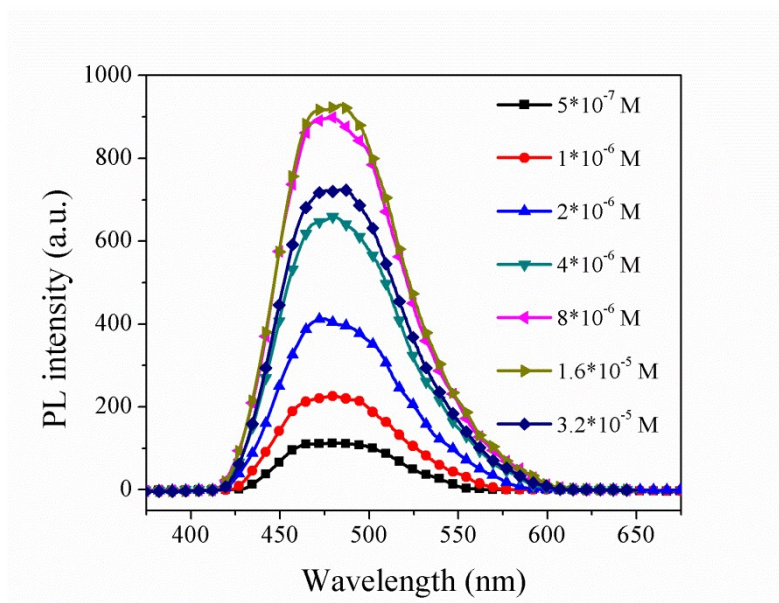

Figure S2.

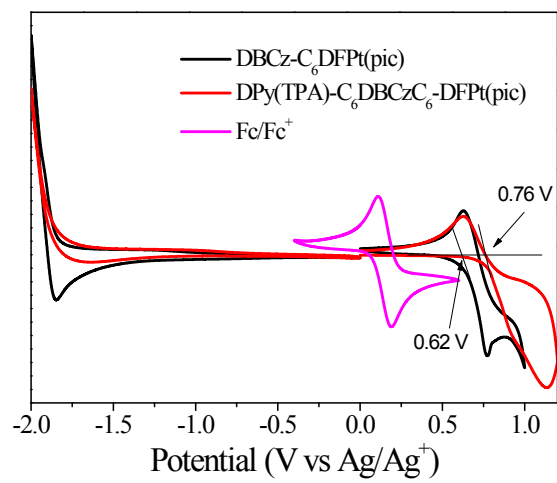

Figure S3.

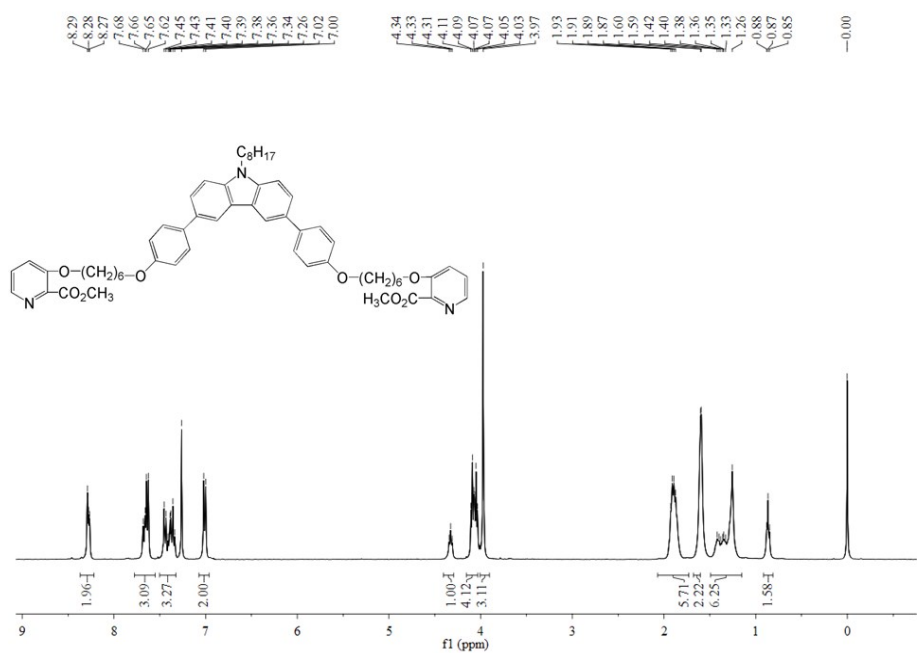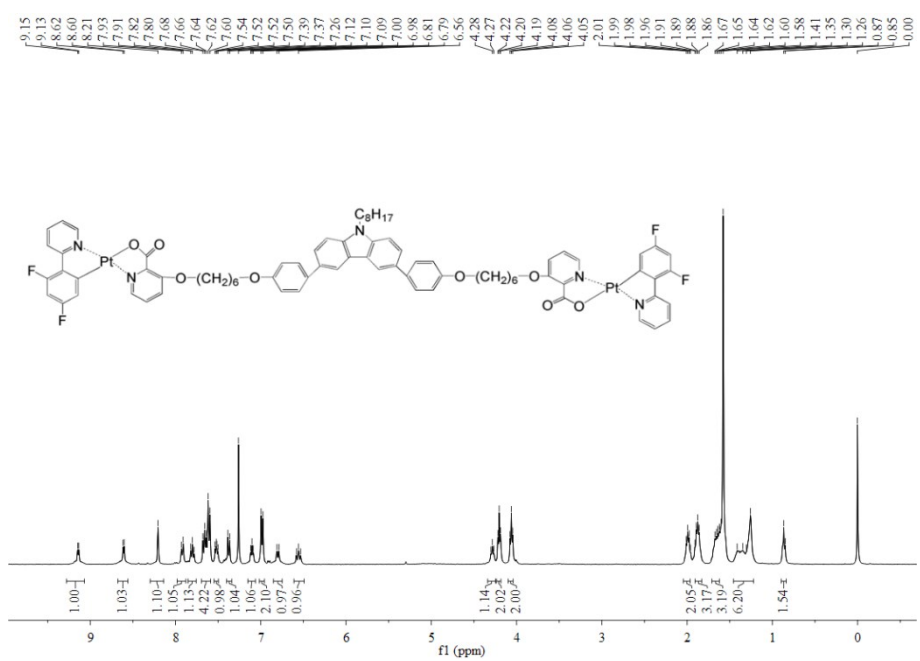

Figure S4

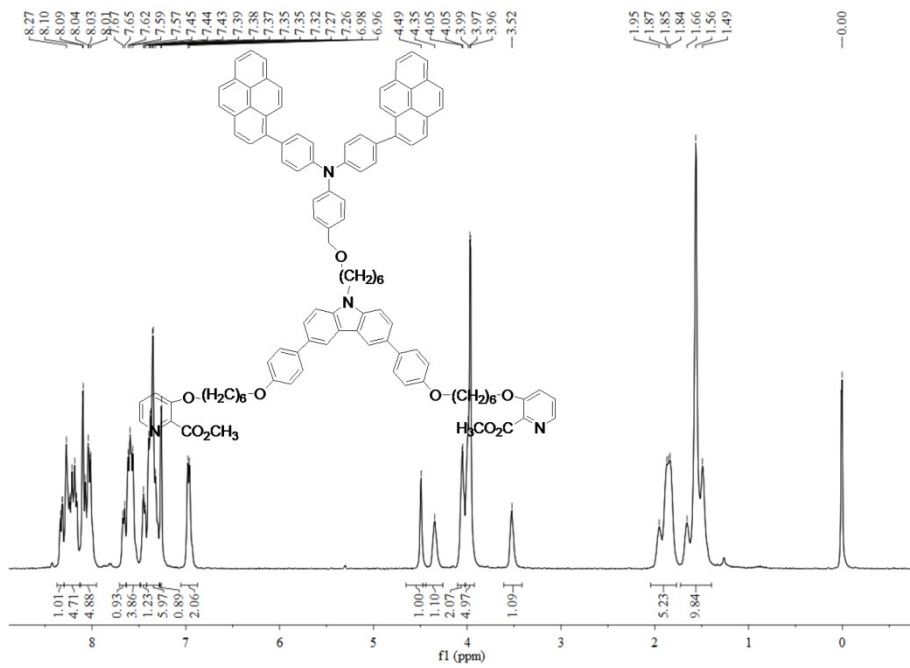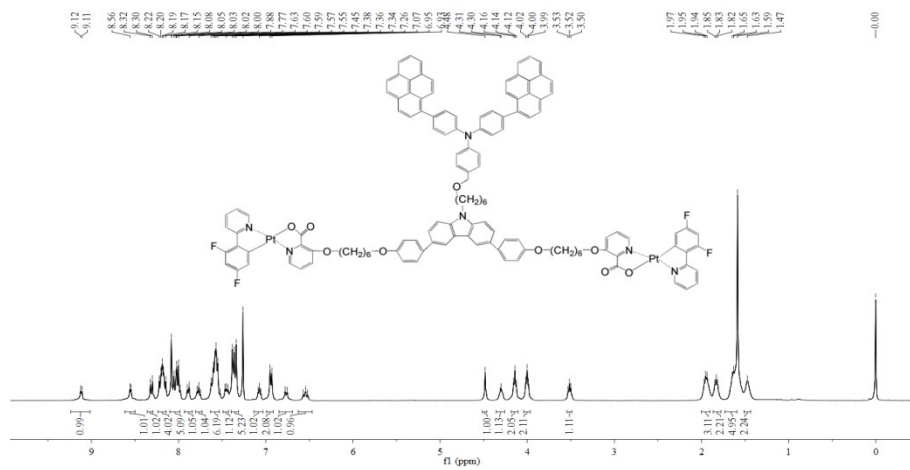

Figure S5.

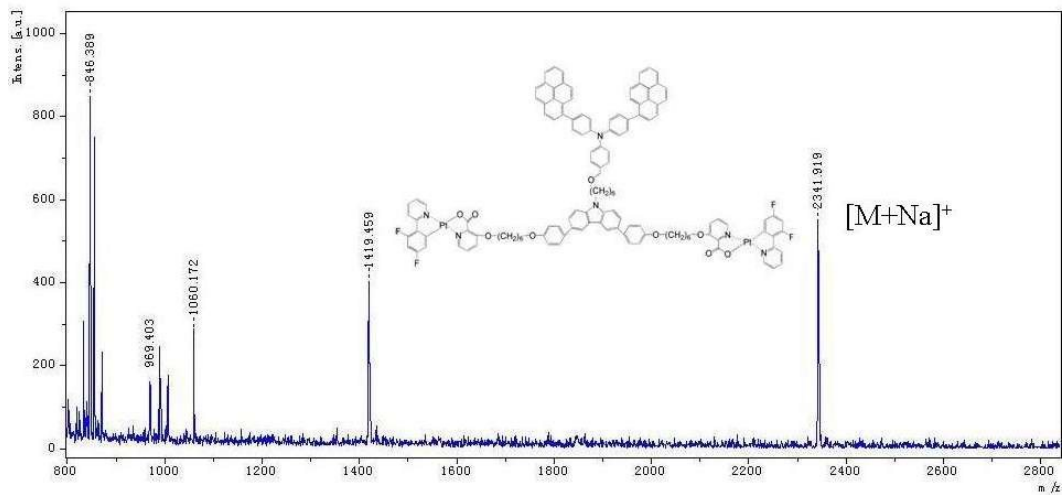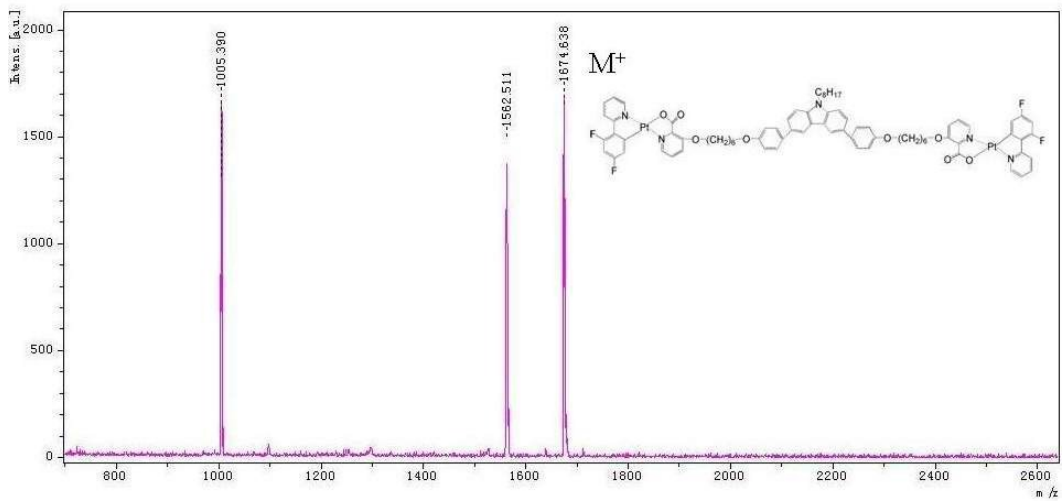

Supplement: c6dt02472f1.pdf [file c6dt02472f1.pdf]
